# Supplementary material for: Synthesis of methylenebisamides using CC- or DCMT-activated DMSO
Source: Beilstein J Org Chem. 2008 Dec 15;4:51. doi: 10.3762/bjoc.4.51 (PMC2633661; doi:10.3762/bjoc.4.51)
Supplement: File 2 — NMR spectra of new compounds [file Beilstein_J_Org_Chem-04-51-s002.doc]

# Supporting information

# Synthesis of methylenebisamides using CC- or DCMT-activated DMSO

Qiang Wang1,2, Lili Sun1, Yu Jiang1 and Chunbao Li1,*

Address: 1Department of Chemistry, College of Science, Tianjin University, Tianjin 300072, China and 2State Key Laboratory Base of Novel Functional Materials and Preparation Science at Ningbo, Faculty of Materials Science and Chemical Engineering, Ningbo University, Ningbo 315211, China.

Email: Chunbao Li* - [lichunbao@tju.edu.cn](mailto:lichunbao@tju.edu.cn)

* Corresponding author

**1H NMR and 13C NMR spectra of new compounds**
